# Supplementary material for: DNA-templated borononucleic acid self assembly: a study of minimal complexity
Source: Royal Society of Chemistry journal article supplement (doi:10.1039/c5ra20767c), 2015-01-01
Supplement: c5ra20767c1.pdf [file c5ra20767c1.pdf]

# DNA-templated boronucleic acids self assembly : A study of minimal complexity

R. Barbeyron, A. R. Martin, J.-J. Vasseur and M. Smietana

## ELECTRONIC SUPPLEMENTARY INFORMATION

|                                             | Pages |
|---------------------------------------------|-------|
| List of Tables and Figures .....            | S1    |
| General.....                                | S2    |
| Syntheses of 5' boronooligonucleotides..... | S2    |
| Analyses of 5' boronooligonucleotides ..... | S3    |
| Denaturation experiments.....               | S8    |
| Melting curves and their derivatives.....   | S10   |

### List of Tables and Figures

|                                                                           | Pages |
|---------------------------------------------------------------------------|-------|
| <b>Table S1.</b> Coupling conditions for oligonucleotides syntheses ..... | S2    |
| <b>Table S2.</b> $T_m$ values from Figure 6.....                          | S8    |
| <b>Figure S1.</b> Bar-chart representation of Table 2.....                | S9    |
| <b>Table S3.</b> Results not included in paper tables.....                | S14   |

## **General**

All reagents were purchased from Aldrich or local suppliers and used without purification. All unmodified oligonucleotides used for this study were purchased from Eurogentec. Synthesized 5' borono-oligonucleotides were purified by RP-HPLC (Dionex Ultimate 3000) with a Nucleodur 100-7 C18 column (125 x 8 mm; Macherey-Nagel) and analyzed with a Nucleodur 100-3 C18 column (75 x 4.6 mm; Macherey-Nagel) and by MALDI-TOF MS (Voyager PerSeptive Biosystems) using trihydroxyacetophenone (THAP) as matrix and ammonium citrate as co-matrix. Thermal denaturation experiments were performed on a VARIAN Cary 300 UV spectrophotometer equipped with a Peltier temperature controller and a thermal analysis software.

## **Syntheses of 5' boronooligonucleotides**

Syntheses were performed in 1  $\mu$ mol scale using an ABI 381A DNA synthesizer by phosphoramidite chemistry with conditions described in Table S1. dT<sup>bn</sup>-phosphoramidite was synthesized and incorporated at the 5'-end of an oligonucleotide according to previous records.<sup>[1,2]</sup>

**Table S1.** Coupling conditions for oligonucleotides syntheses.

| Step | Reaction   | Reagent                                                             | Time (s) |
|------|------------|---------------------------------------------------------------------|----------|
| 1    | Deblocking | 3% TCA in DCM                                                       | 35       |
| 2    | Coupling   | 0.1M amidite in CH <sub>3</sub> CN + 0.3M BMT in CH <sub>3</sub> CN | 20       |
| 3    | Capping    | Ac <sub>2</sub> O/THF/Pyridine + 10% NMI in THF                     | 8        |
| 4    | Oxidation  | 0.1M I <sub>2</sub> in THF/H <sub>2</sub> O/Pyridine                | 15       |

<sup>1</sup> D. Luvino, C. Baraguey, M. Smietana, J. J. Vasseur, *Chem. Commun.* **2008**, 2352.

<sup>2</sup> A. R. Martin, I. Barvik, D. Luvino, M. Smietana, J. J. Vasseur, *Angew. Chem.* **2011**, 50, 4193.

## Analyses of 5' boronooligonucleotides

### *HPLC and MALDI-TOF analysis of B<sub>5</sub> 5'-T<sup>bn</sup>ATGU-3'*

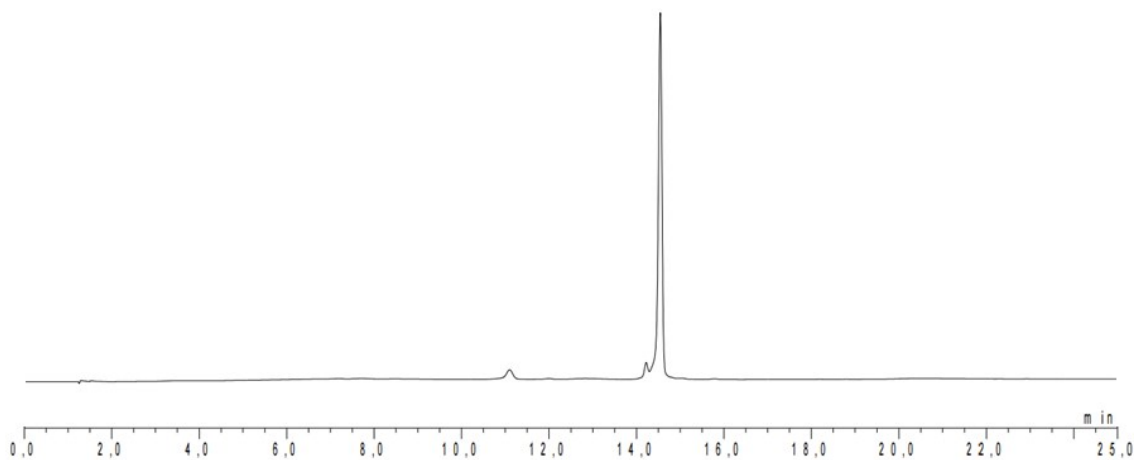

HPLC conditions analysis: Column Nucleodur C18, 100 Å, 3 µm, elution with a linear gradient of 0 to 20% CH<sub>3</sub>CN in triethylammonium acetate buffer, pH 7, in 25 min, Flow rate 1 mL.min<sup>-1</sup>, λ 260 nm.

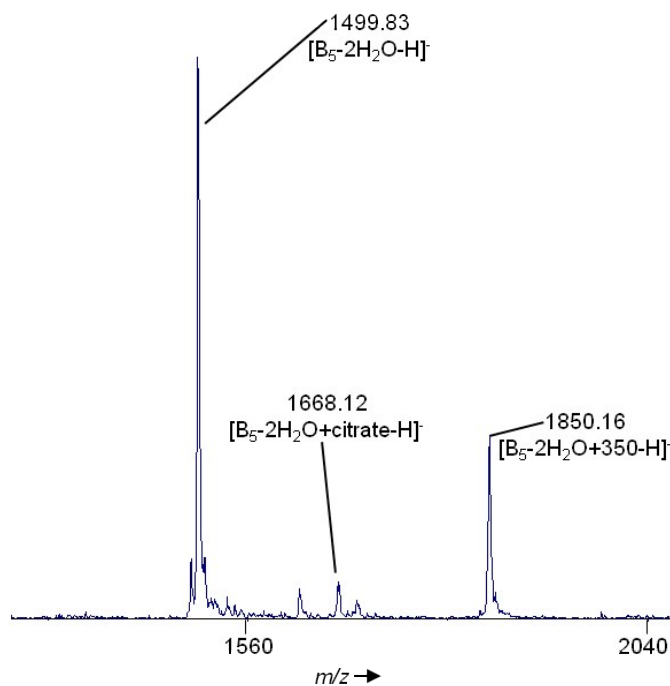

MALDI-TOF MS conditions analysis: ionization in negative mode, THAP (MW= 168.15 g.mol<sup>-1</sup>) as matrix and ammonium citrate (MW= 243.2 g.mol<sup>-1</sup>) as co-matrix, delay time 100 ns and an acceleration voltage of 24 kV.

*HPLC and MALDI-TOF analysis of B<sub>5'</sub> 5'-T<sup>bn</sup>GTAU-3'*

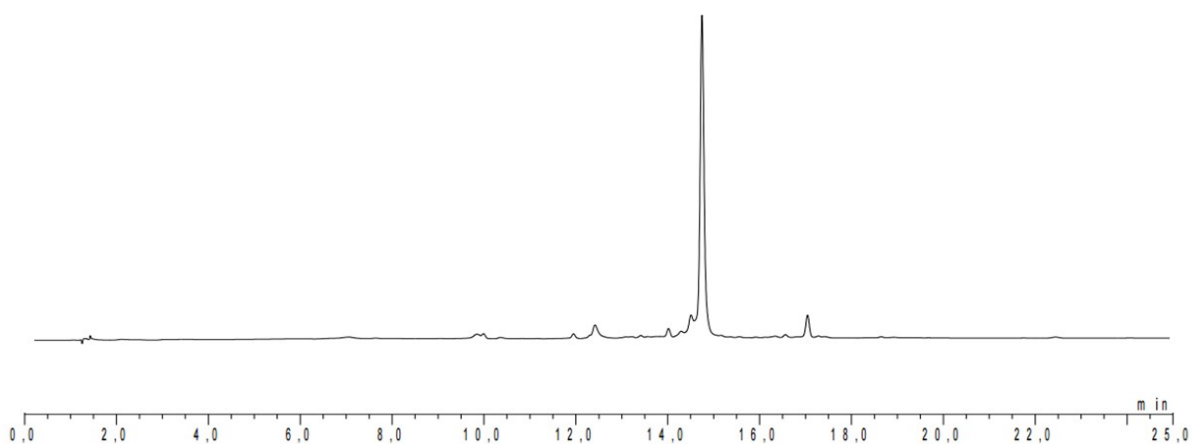

HPLC conditions analysis: Column Nucleodur C18, 100 Å, 3 µm, elution with a linear gradient of 0 to 20% CH<sub>3</sub>CN in triethylammonium acetate buffer, pH 7, in 25 min, Flow rate 1 mL.min<sup>-1</sup>, λ 260 nm.

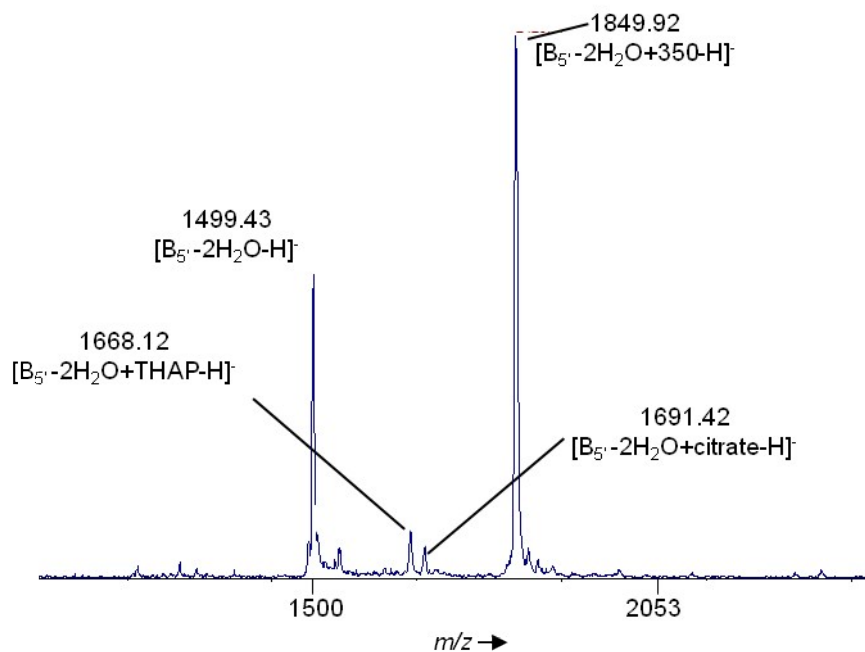

MALDI-TOF MS conditions analysis: ionization in negative mode THAP (MW= 168.15 g.mol<sup>-1</sup>) as matrix and ammonium citrate (MW= 243.2 g.mol<sup>-1</sup>) as co-matrix, delay time 100 ns and an acceleration voltage of 24 kV.

*HPLC and MALDI-TOF analysis of B<sub>4</sub> 5'-T<sup>bn</sup>GTA-3'*

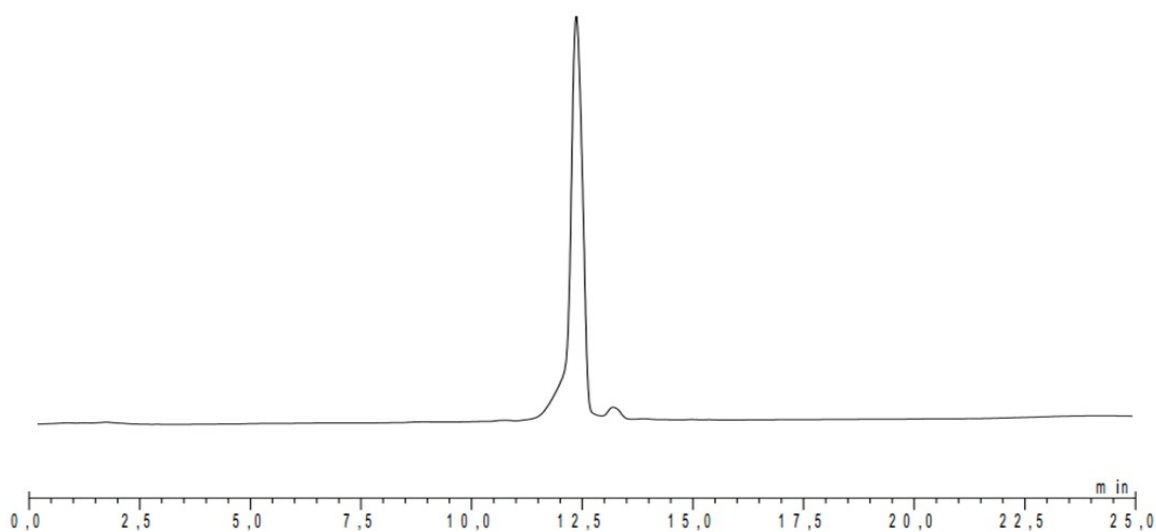

HPLC conditions analysis: Column Nucleodur C18, 100 Å, 3 µm, elution with a linear gradient of 0 to 25% CH<sub>3</sub>CN in triethylammonium acetate buffer, pH 7, in 20min, Flow rate 1 mL.min<sup>-1</sup>, λ 260 nm.

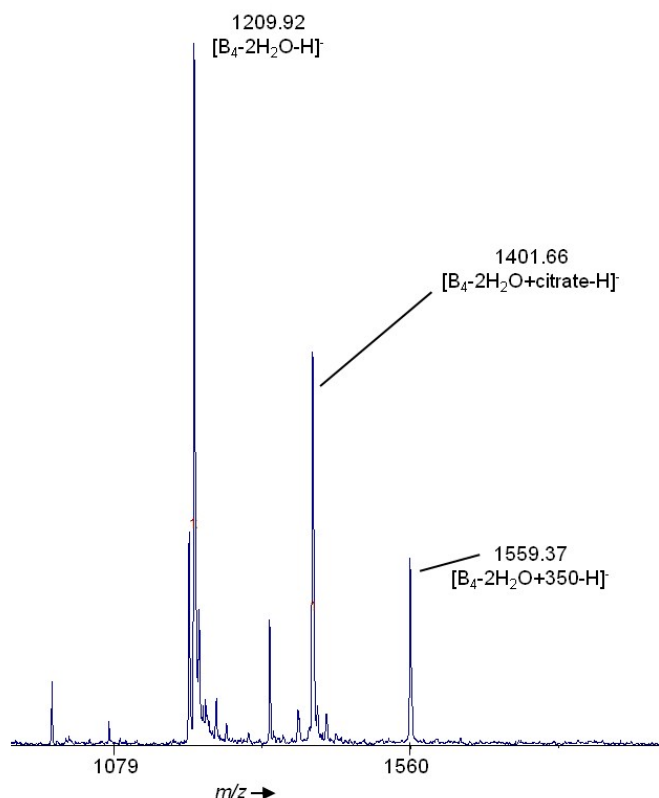

MALDI-TOF MS conditions analysis: ionization in negative mode, THAP (MW= 168.15 g.mol<sup>-1</sup>) as matrix and ammonium citrate (MW= 243.2 g.mol<sup>-1</sup>) as co-matrix, delay time 150 ns and an acceleration voltage of 24 kV.

*HPLC and MALDI-TOF analysis of B<sub>4</sub>' 5'-T<sup>bn</sup>TGA-3'*

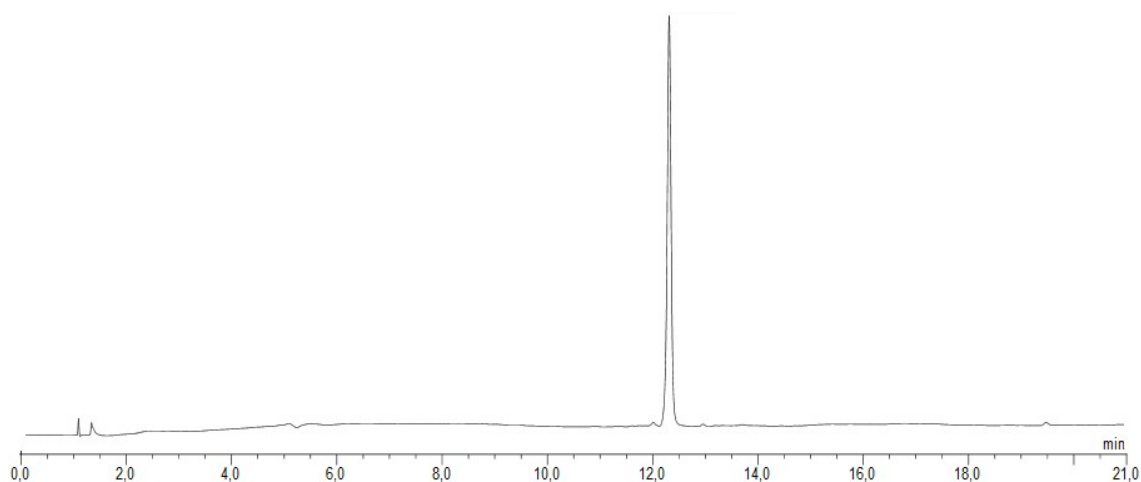

HPLC conditions analysis: Column Nucleodur C18, 100 Å, 3 µm, elution with a linear gradient of 0 to 25% CH<sub>3</sub>CN in triethylammonium acetate buffer, pH 7, in 20min, Flow rate 1 mL.min<sup>-1</sup>, λ 260 nm.

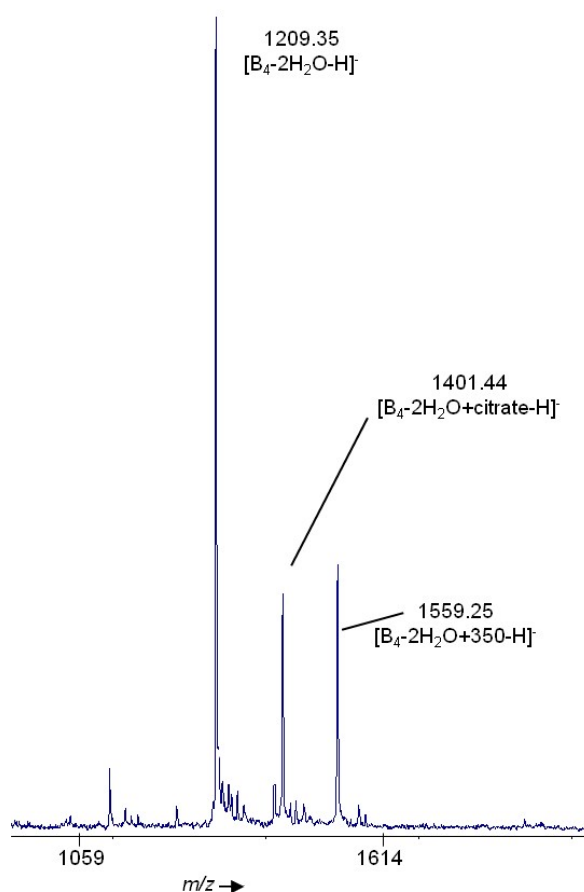

MALDI-TOF MS conditions analysis: ionization in negative mode, THAP (MW= 168.15 g.mol<sup>-1</sup>) as matrix and ammonium citrate (MW= 243.2 g.mol<sup>-1</sup>) as co-matrix, delay time 150 ns and an acceleration voltage of 24 kV.

*HPLC and MALDI-TOF analysis of B<sub>3</sub> 5'-T<sup>bn</sup>CA-3'*

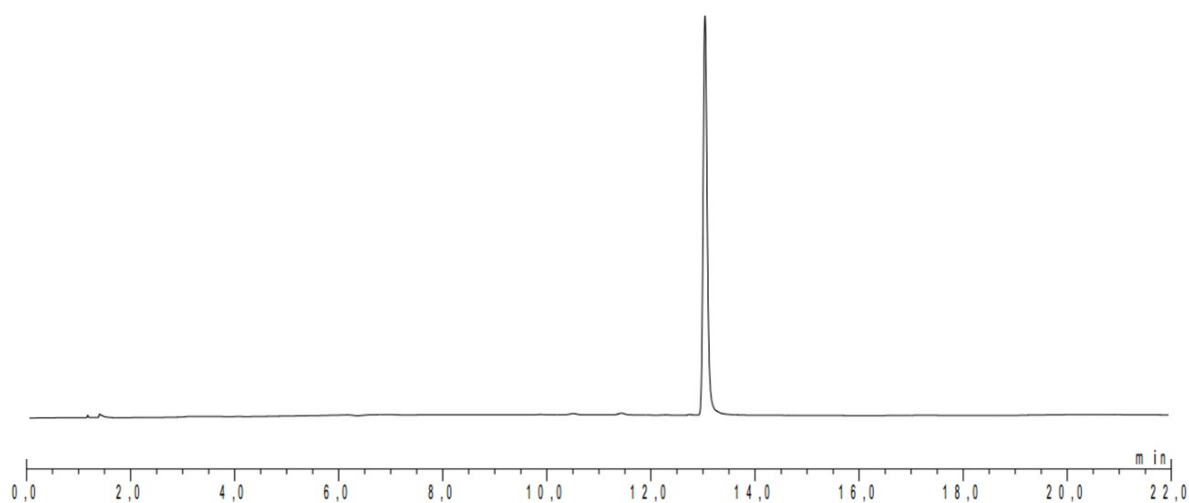

HPLC conditions analysis: Column Nucleodur C18, 100 Å, 3 µm, elution with a linear gradient of 0 to 16% CH<sub>3</sub>CN in triethylammonium acetate buffer, pH 7, in 20min, Flow rate 1 mL.min<sup>-1</sup>, λ 260 nm.

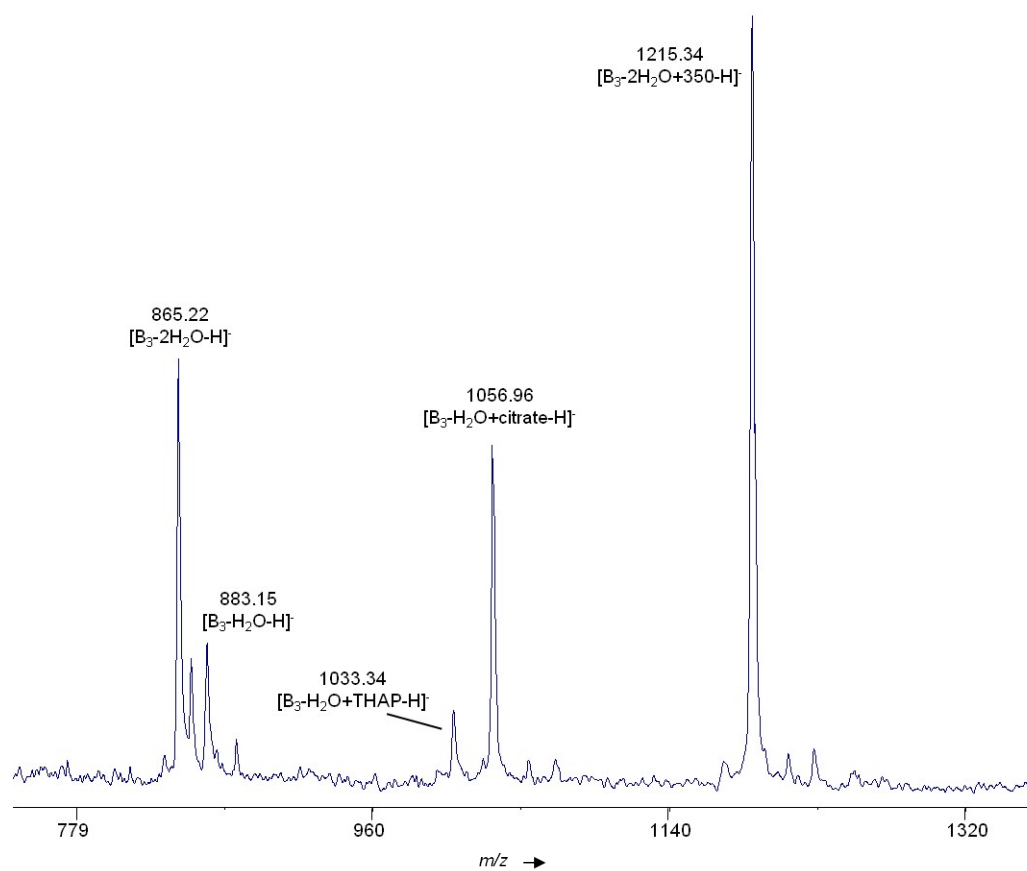

MALDI-TOF MS conditions analysis: ionization in negative mode, THAP (MW= 168.15 g.mol<sup>-1</sup>) as matrix and ammonium citrate (MW= 243.2 g.mol<sup>-1</sup>) as co-matrix, delay time 150 ns and an acceleration voltage of 24 kV.

## Denaturation experiments

Unless otherwise stated, the samples were prepared by mixing 3  $\mu$ M of the template with stoichiometric amounts of complementary strands. Denaturation experiments were performed in a 1M NaCl, 10mM sodium cacodylate buffer at pH 7.5 or 9.5. A heating-cooling-heating cycle in the 0-90°C temperature range with a gradient of 0.5°C/min was applied.

$T_m$  values were determined from the maxima of the first derivative plots of absorbance at 260 nm versus temperature.

## Melting curves and their derivatives

**Table S2 :  $T_m$  values from Figure 6.**

| Entry | Bifunctionnal Strand <sup>a</sup>   | $T_m^b$ [°C] according to the excess of B <sub>n</sub> |                |                |                   |                   |                   |
|-------|-------------------------------------|--------------------------------------------------------|----------------|----------------|-------------------|-------------------|-------------------|
|       |                                     | 1 eq                                                   | 2 eq           | 3 eq           | 4 eq              | 5 eq              | 6 eq              |
| 1     | B <sub>5</sub> T <sup>bn</sup> ATGU | 14.9 ±0.3                                              | 17.1 ±0.3      | 19.1 ±0.3      | 20.8 ±0.2         | 21.9 ±0.2         | 22.5 ±0.4         |
| 2     | B <sub>4</sub> T <sup>bn</sup> GTA  | 7.2 ±0.2                                               | 9.2 ±0.1       | 12.0 ±0.2      | 14.0 ±0.1         | 14.9 ±0.1         | 14.0 ±0.3         |
| 3     | B <sub>3</sub> T <sup>bn</sup> CA   | - <sup>c</sup>                                         | - <sup>c</sup> | - <sup>c</sup> | - <sup>c</sup>    | - <sup>c</sup>    | - <sup>c</sup>    |
| 4     | B <sub>5</sub> with primer          | 29.0 ±0.3                                              | 29.0 ±0.2      | 29.0 ±0.2      | n.d. <sup>d</sup> | n.d. <sup>d</sup> | n.d. <sup>d</sup> |
| 5     | B <sub>4</sub> with primer          | 21.0 ±0.3                                              | 25.0 ±0.1      | 26.0 ±0.1      | 25.8 ±0.2         | n.d. <sup>d</sup> | n.d. <sup>d</sup> |
| 6     | B <sub>3</sub> with primer          | 10.7 ±0.1                                              | 13.6 ±0.2      | 15.3 ±0.4      | 15.8 ±0.2         | n.d. <sup>d</sup> | n.d. <sup>d</sup> |

<sup>a</sup> T<sup>bn</sup> refers to boronothymidine and bold letters represent RNA residues. <sup>b</sup> Melting temperatures are obtained from the maxima of the first derivatives of the melting curve ( $A_{260}$  vs temperature) recorded in a buffer containing 1 M NaCl and 10 mM of sodium cacodylate, Template concentration 3  $\mu$ M. Curve fits data were averaged from fits of three denaturation curves. Uncertainties were estimated from standard deviations of experimental melting temperatures. <sup>c</sup>  $T_m$  lower than 5 °C. <sup>d</sup> Not determined.

**Figure S1.** Bar-chart representation of Table 2.

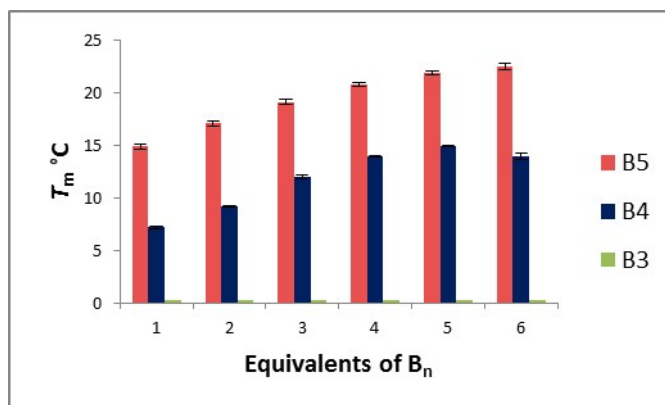

Melting temperatures are obtained from the maxima of the first derivatives of the melting curve ( $A_{260}$  vs temperature) recorded in a buffer containing 1 M NaCl and 10 mM of sodium cacodylate, Template concentration 3  $\mu$ M. Curve fits data were averaged from fits of three denaturation curves.

***Melting curves and derivatives from Table S2.***

**Table S2, entry 1 :**

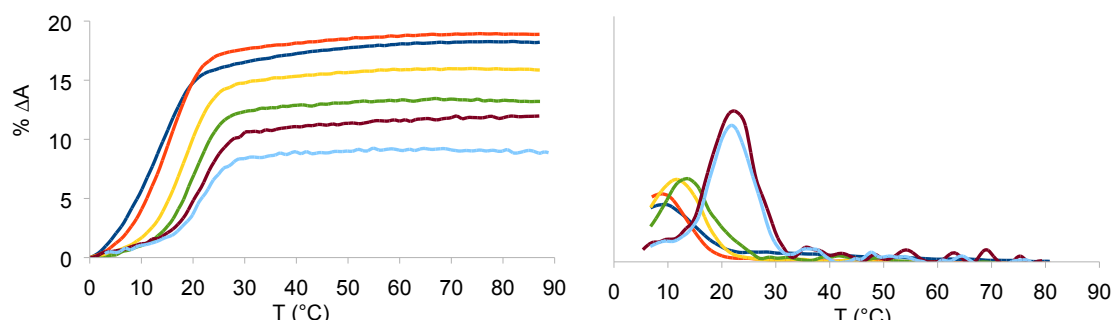

Melting curves and their derivatives at pH 9.5 of the complex 3'-CC(ATACA)<sub>3</sub>CC with 5'-T<sup>bn</sup>ATGrU 1eq (blue) ; 2eq (orange) ; 3eq (yellow) ; 4eq (green) ; 5eq (brown) and 6eq (cyan).

**Table S2, entry 2 :**

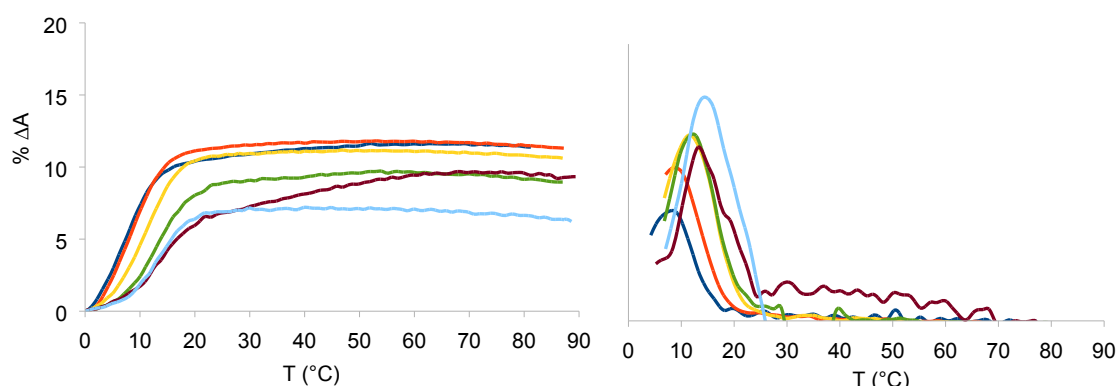

Melting curves and their derivatives at pH 9.5 of the complex 3'-CC(ACAT)<sub>3</sub>CC with 5'-T<sup>bn</sup>GTrA 1eq (blue) ; 2eq (orange) ; 3eq (yellow) ; 4eq (green) ; 5eq (brown) and 6eq (cyan).

**Table S2, entry 3 :**

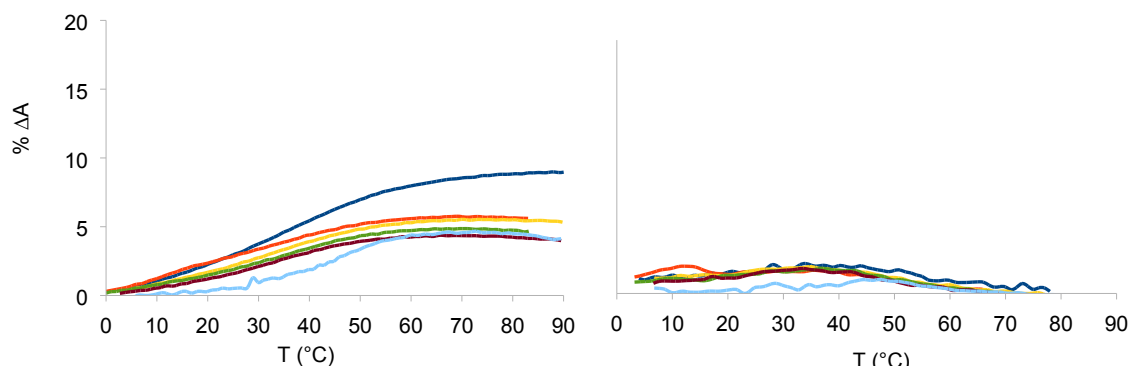

Melting curves and their derivatives at pH 9.5 of the complex 3'-CC(AGT)<sub>3</sub>CC with 5'-T<sup>bn</sup>CrA 1eq (blue) ; 2eq (orange) ; 3eq (yellow) ; 4eq (green) ; 5eq (brown) and 6eq (cyan).

**Table S2, entry 4 :**

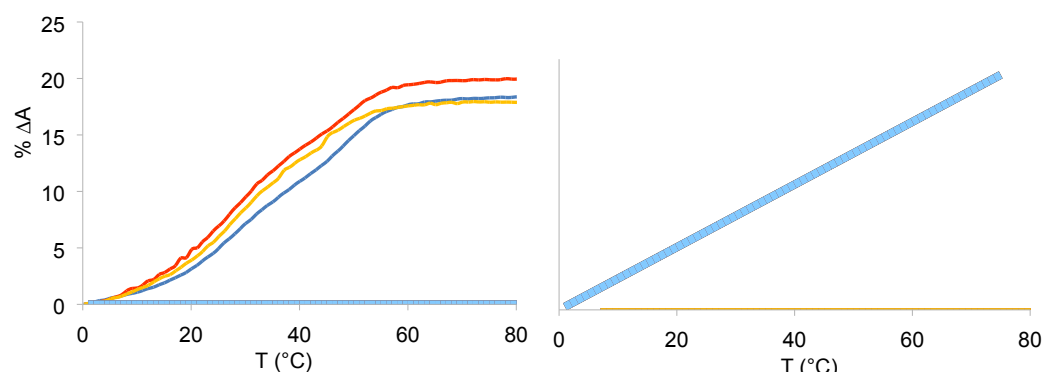

Melting curves and their derivatives at pH 9.5 of the complex 3'-CC(ACATA)<sub>3</sub>(AGT)<sub>3</sub>CC/5'-GGTCATCATCrA/5'-T<sup>bn</sup>ATGrU 1eq (blue) ; 2eq (orange) ; 3eq (yellow).

**Table S2, entry 5 :**

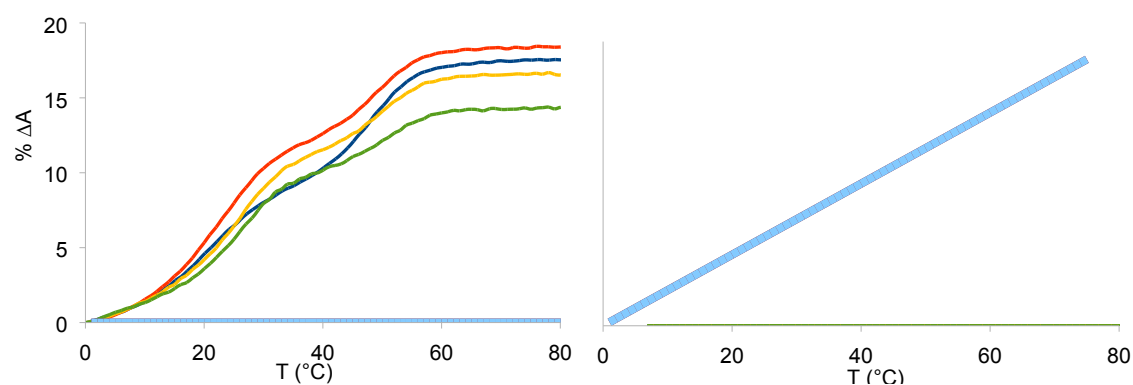

Melting curves and their derivatives at pH 9.5 of the complex 3'-CC(ACAT)<sub>3</sub>(AGT)<sub>3</sub>CC/5'-GGTCATCATCrA/5'-T<sup>bn</sup>GTrA 1eq (blue) ; 2eq (orange) ; 3eq (yellow) ; 4eq (green).

**Table S2, entry 6 :**

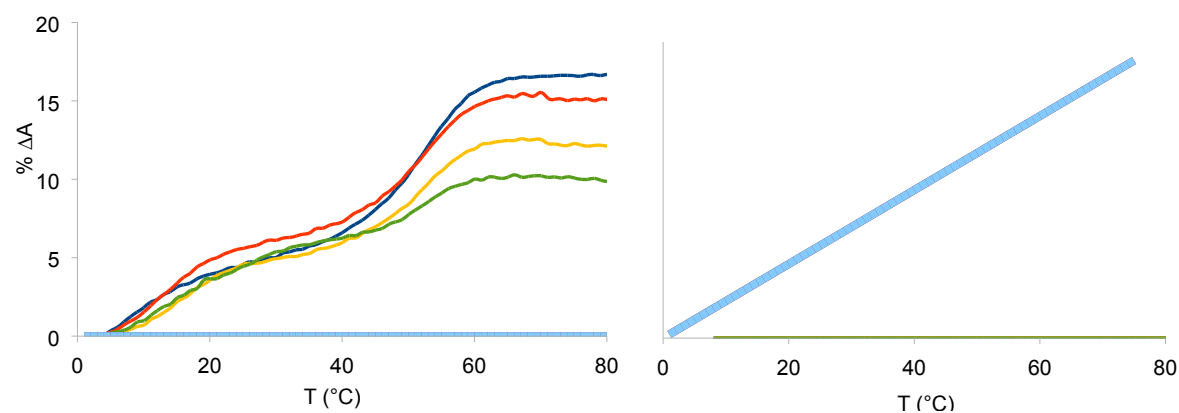

Melting curves and their derivatives at pH 9.5 of the complex 3'-CC(AGT)<sub>3</sub>(AGT)<sub>3</sub>CC/5'-GGTCATCATCrA/5'-T<sup>bn</sup>CrA 1eq (blue) ; 2eq (orange) ; 3eq (yellow) ; 4eq (green).

***Melting curves and derivatives from Table 3.***

**Table 3, entry 1 :**

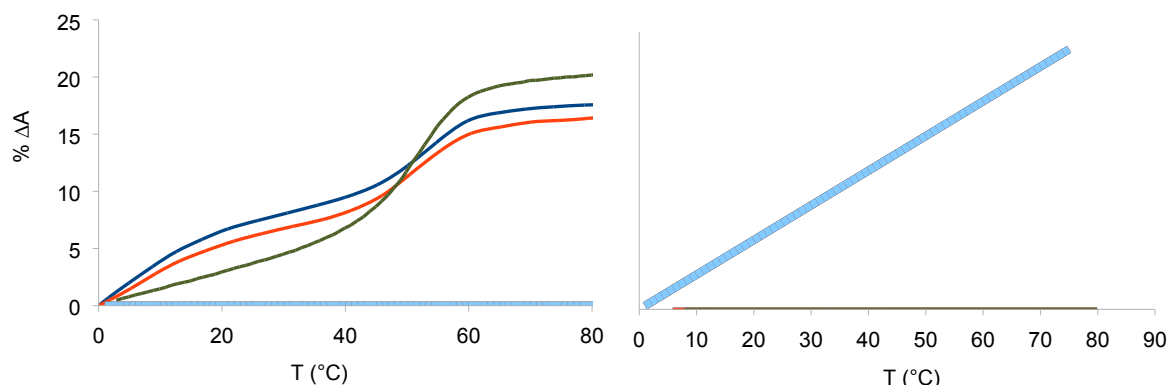

Melting curves and their derivatives of the complex 3'-CC(ATACA)<sub>3</sub>(AGT)<sub>3</sub>CC/5'-GGTCATCATCrA/5'-TATGrU at pH 7.5 (blue) ; pH 9.5 (orange) ; pH 7.5 3mM CN<sup>-</sup> (green).

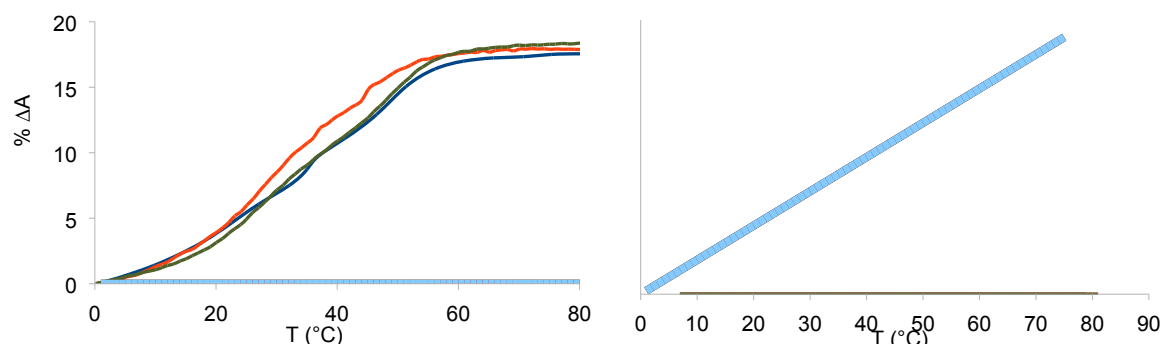

Melting curves and their derivatives of the complex 3'-CC(ATACA)<sub>3</sub>(AGT)<sub>3</sub>CC/5'-GGTCATCATCrA/5'-T<sup>bn</sup>ATGrU at pH 7.5 (blue) ; pH 9.5 (orange) ; pH 7.5 3mM CN<sup>-</sup> (green).

**Table 3, entry 2 :**

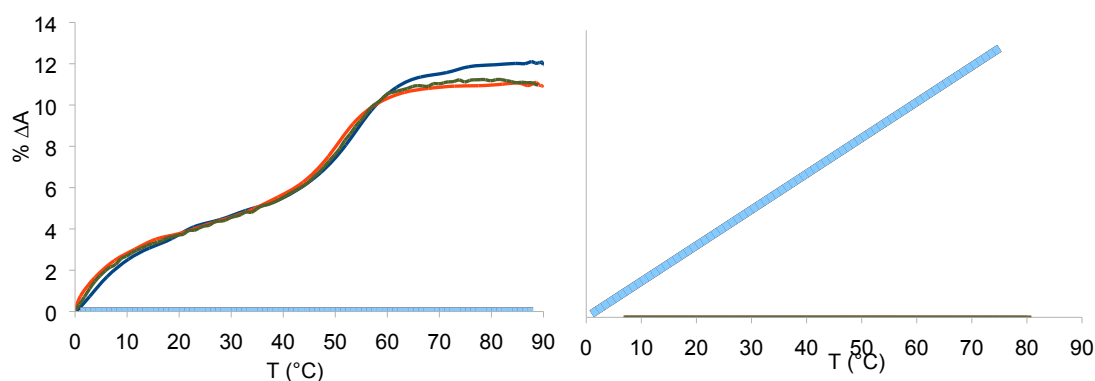

Melting curves and their derivatives of the complex 3'-CC(ACAT)<sub>3</sub>(AGT)<sub>3</sub>CC/5'-GGTCATCATCrA/5'-TGTrA at pH 7.5 (blue) ; pH 9.5 (orange) ; pH 7.5 3mM CN<sup>-</sup> (green).

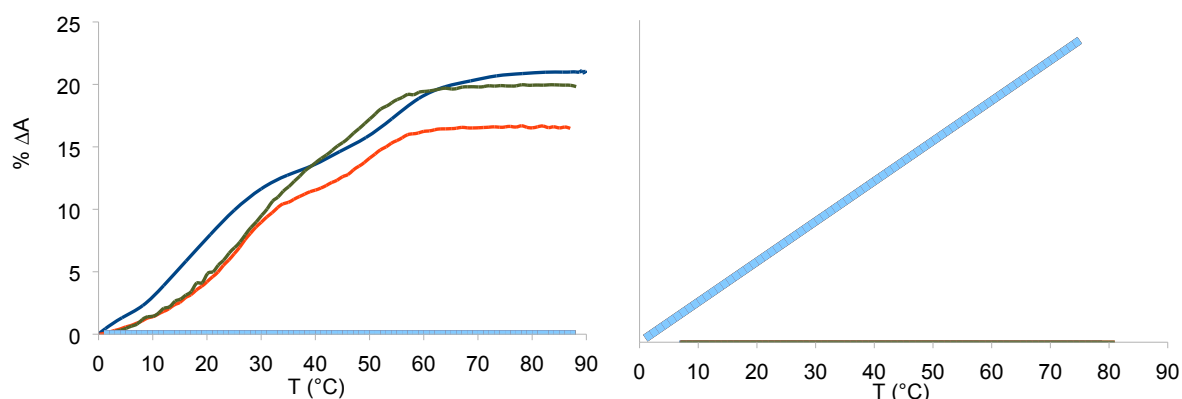

Melting curves and their derivatives of the complex 3'-CC(ACAT)<sub>3</sub>(AGT)<sub>3</sub>CC/5'-GGTCATCATCrA/5'-T<sup>bn</sup>GTrA at pH 7.5 (blue) ; pH 9.5 (orange) ; pH 7.5 3mM CN<sup>-</sup> (green).

**Table 3, entry 3 :**

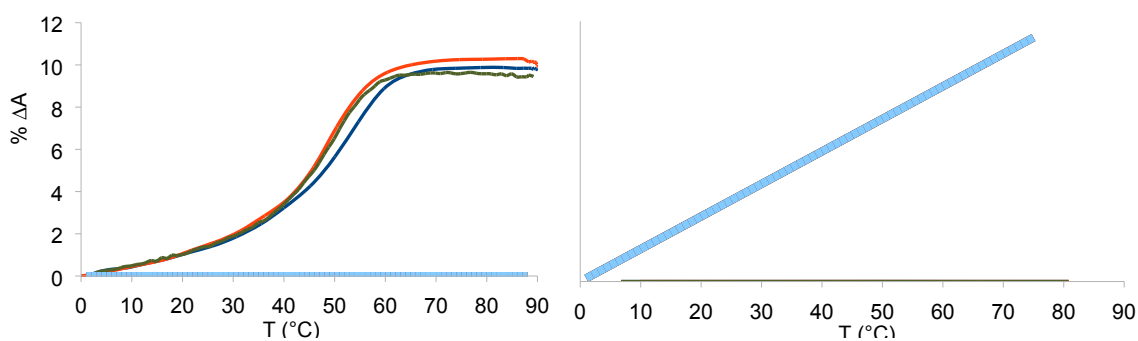

Melting curves and their derivatives of the complex 3'-CC(AGT)<sub>6</sub>CC/5'-GGTCATCATCrA/5'-TCrA at pH 7.5 (blue) ; pH 9.5 (orange) ; pH 7.5 3mM CN<sup>-</sup> (green).

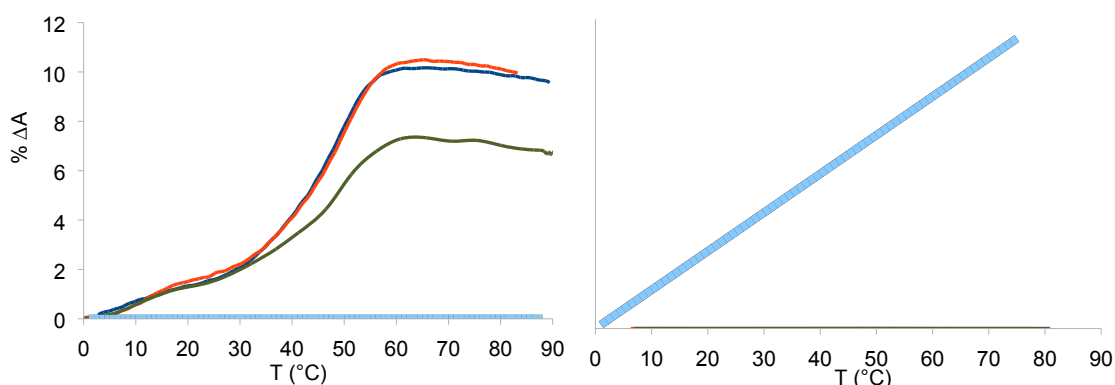

Melting curves and their derivatives of the complex 3'-CC(AGT)<sub>6</sub>CC/5'-GGTCATCATCrA/5'-T<sup>bn</sup>CrA at pH 7.5 (blue) ; pH 9.5 (orange) ; pH 7.5 3mM CN<sup>-</sup> (green).

**Table S3. Results not included in paper tables.**

| Entry | Template        | Template sequence (5'-3')   | Sequences                        | $T_m$ [°C] <sup>a</sup>           |
|-------|-----------------|-----------------------------|----------------------------------|-----------------------------------|
| 1     | T <sub>5</sub>  | CC-(ACATA) <sub>3</sub> -CC | B <sub>5</sub> 5eq               | pH 7.5 3mM CN <sup>-</sup> : 20.2 |
|       | T <sub>4</sub>  | CC-(TACA) <sub>3</sub> -CC  | B <sub>4</sub> 5eq               | pH 7.5 3mM CN <sup>-</sup> : 13.0 |
|       |                 |                             | B <sub>5</sub>                   | - <sup>c</sup>                    |
| 2     | T <sub>5'</sub> | CC-(ACATA)-ATACA-(ACATA)-CC | B <sub>5'</sub>                  | - <sup>c</sup>                    |
|       |                 |                             | B <sub>5</sub> +B <sub>5'</sub>  | pH 9.5: 20.0                      |
|       |                 |                             | B <sub>4</sub>                   | - <sup>c</sup>                    |
| 3     | T <sub>4'</sub> | CC-(TACA)-TCAA-(TACA)-CC    | B <sub>4'</sub>                  | - <sup>c</sup>                    |
|       |                 |                             | B <sub>4</sub> + B <sub>4'</sub> | pH 9.5: 13.5                      |

<sup>a</sup> Melting temperatures are obtained from the maxima of the first derivatives of the melting curve (A260 vs temperature) recorded in a buffer containing 1 M NaCl and 10 mM of sodium cacodylate, Template concentration 3 μM. Curve fits data were averaged from fits of three denaturation curves.

***Melting curves and derivatives from Table S3.***

**Table S3, entry 1 :**

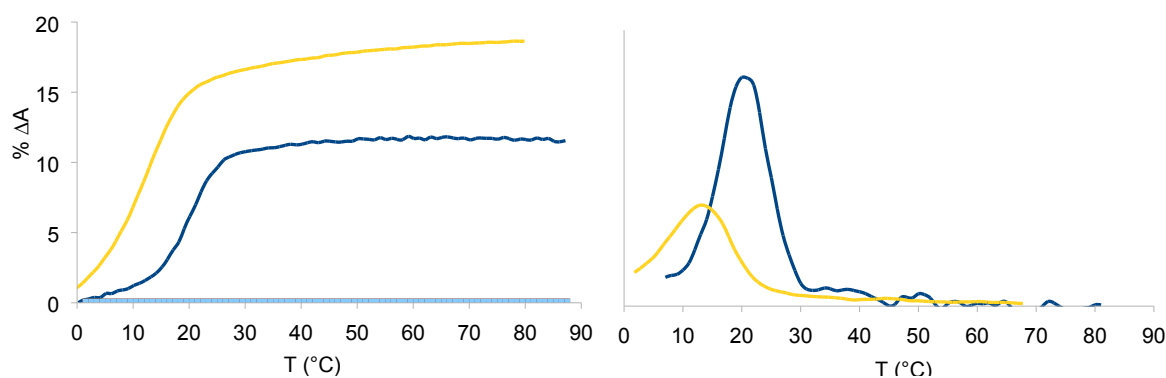

Melting curves and their derivatives at pH 7.5 with 3mM NaCN of complexes 3'-CC(ATACA)<sub>3</sub>CC/5'-T<sup>bn</sup>ATGrU (blue) and 3'-CC(ACAT)<sub>3</sub>CC/5'-T<sup>bn</sup>GTrA (yellow).

**Table S3, entry 2 :**

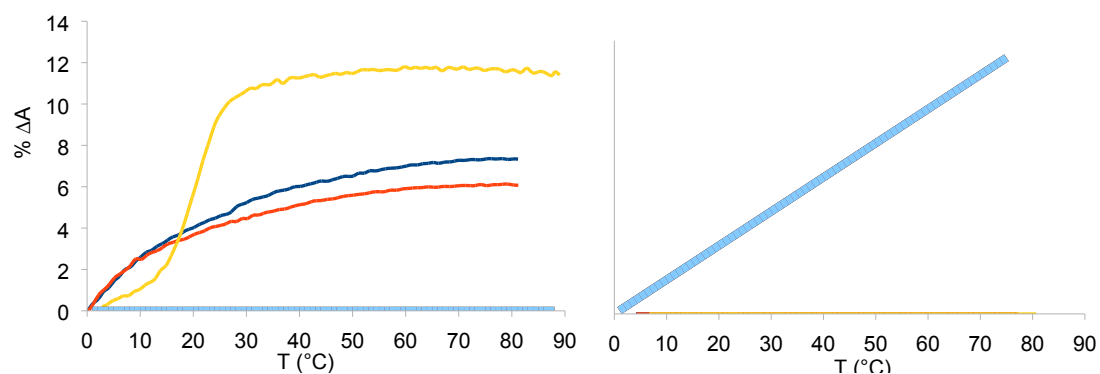

Melting curves and their derivatives at pH 9.5 of template CC-(ACATA)-ATACA-(ACATA)-CC with 5'-T<sup>bn</sup>ATGrU (blue), 5'-T<sup>bn</sup>TAGrU (orange) and both bifunctionnal strands (yellow).

**Table S3, entry 3 :**

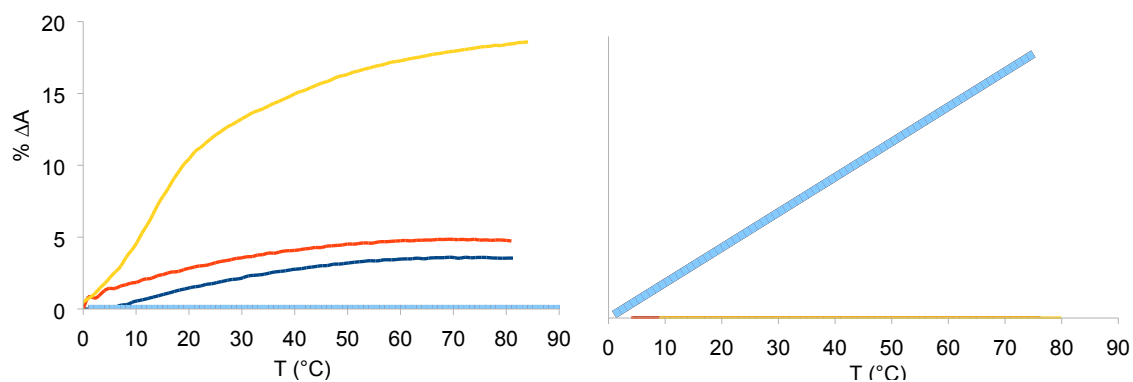

Melting curves and their derivatives at pH 9.5 of template CC-(ACAT)-AACT-(ACAT)-CC with 5'-T<sup>bn</sup>GTrA (blue), 5'-T<sup>bn</sup>TGrA (orange) and both bifunctionnal strands (yellow).
